# Supplementary figures and images for: The van der Waals interactions in systems involving superheavy elements: the case of oganesson (Z = 118)
Source: Royal Society of Chemistry journal article supplement (doi:10.1039/d2cp04456k), 2022-11-29

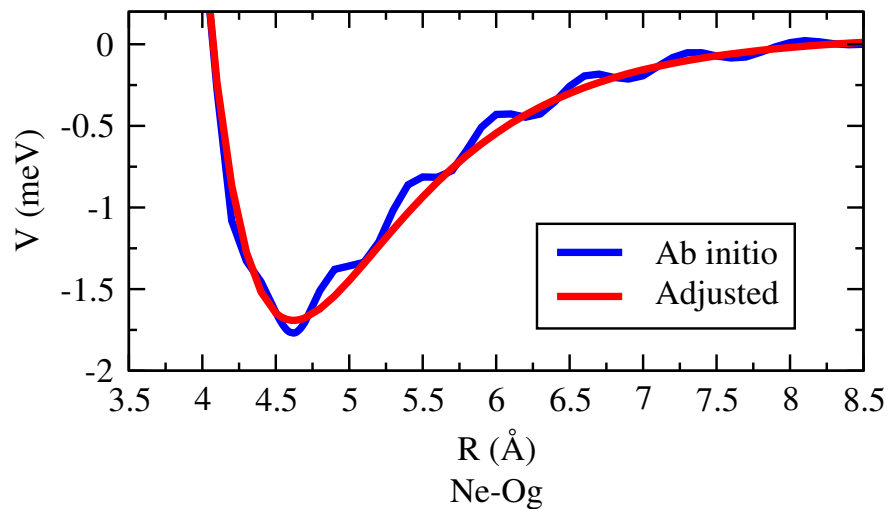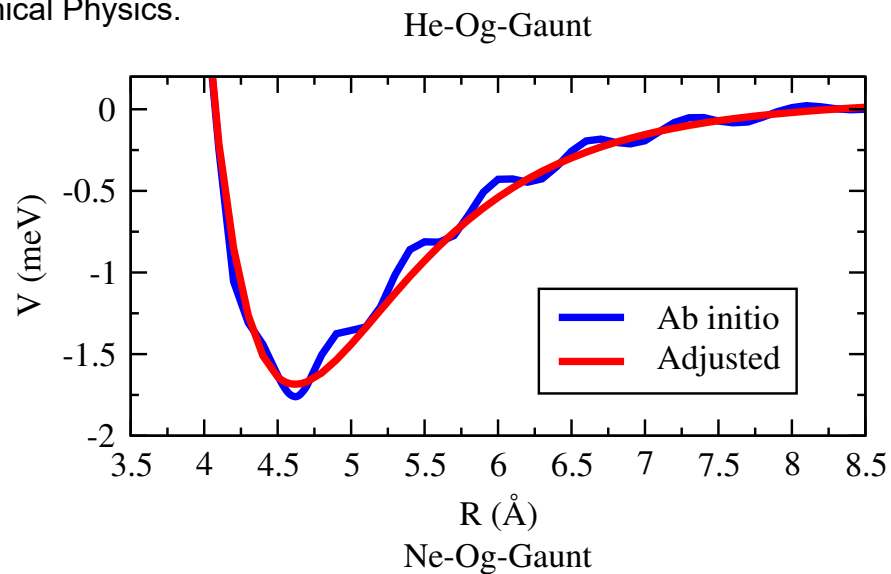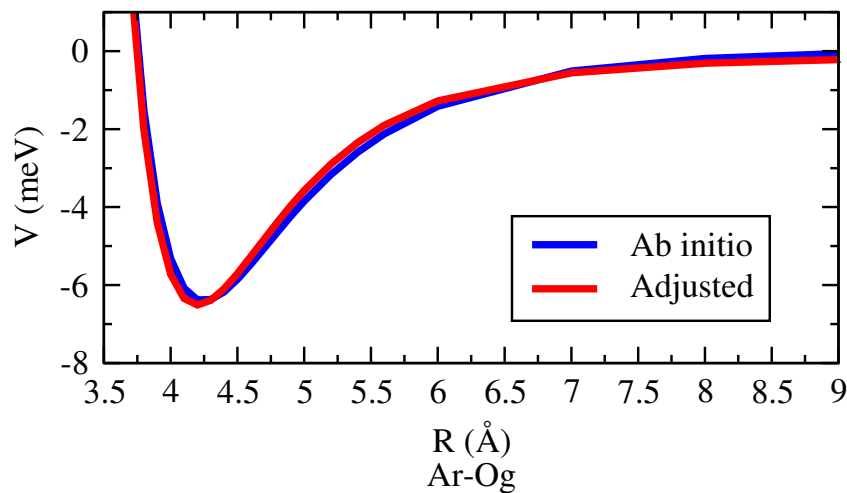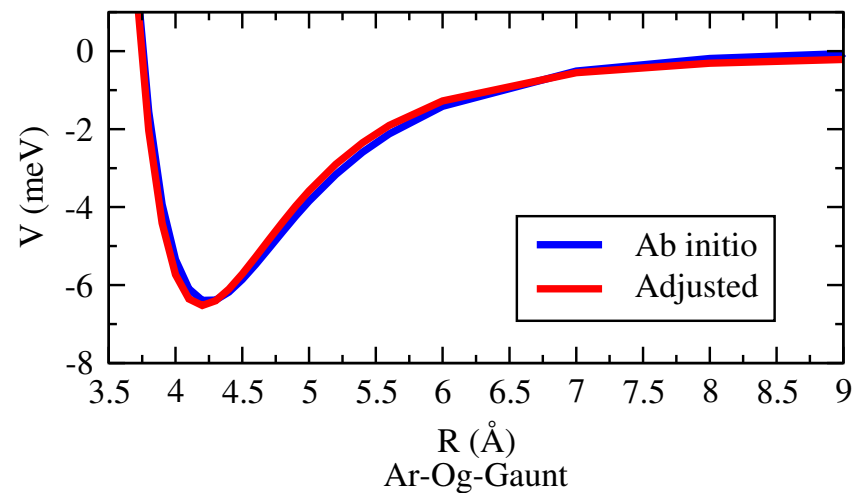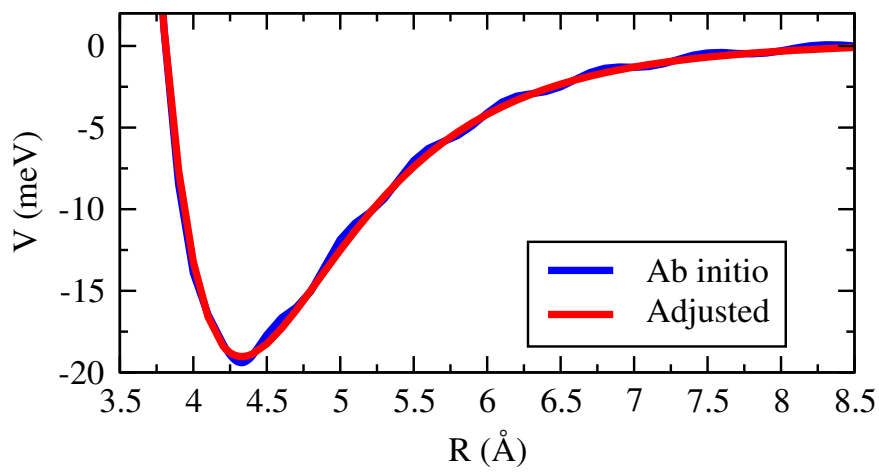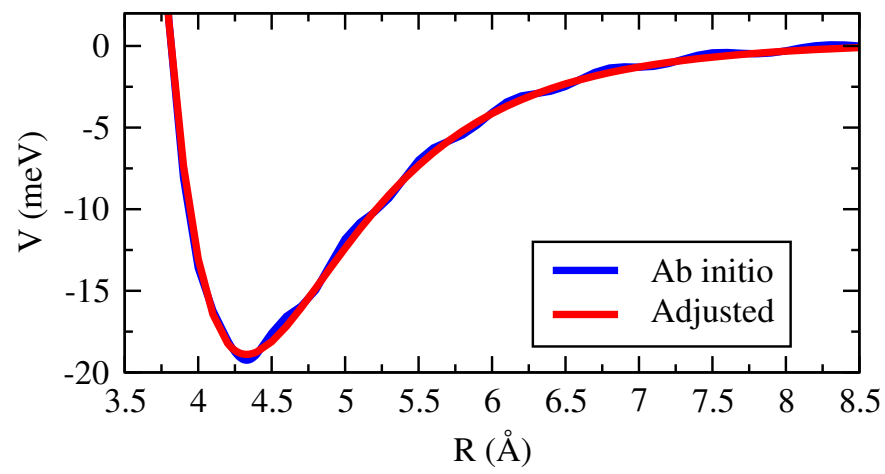

Supplement: d2cp04456k1.pdf [file d2cp04456k1.pdf]

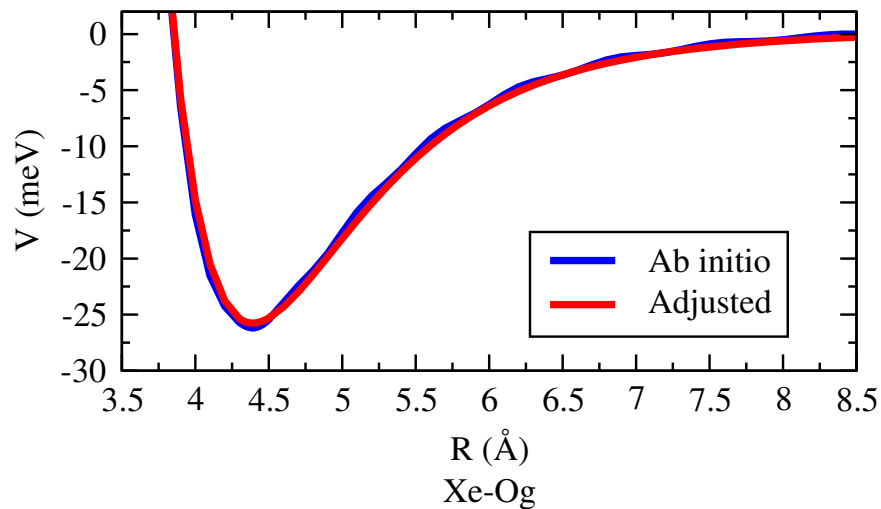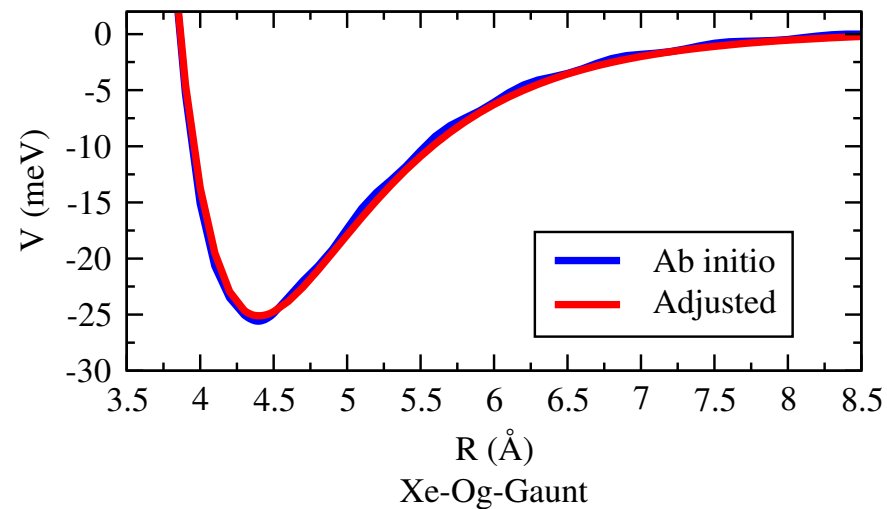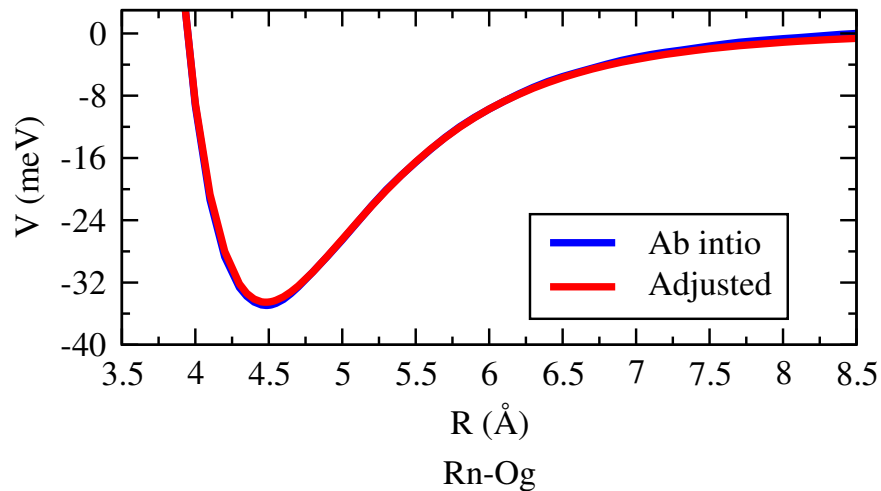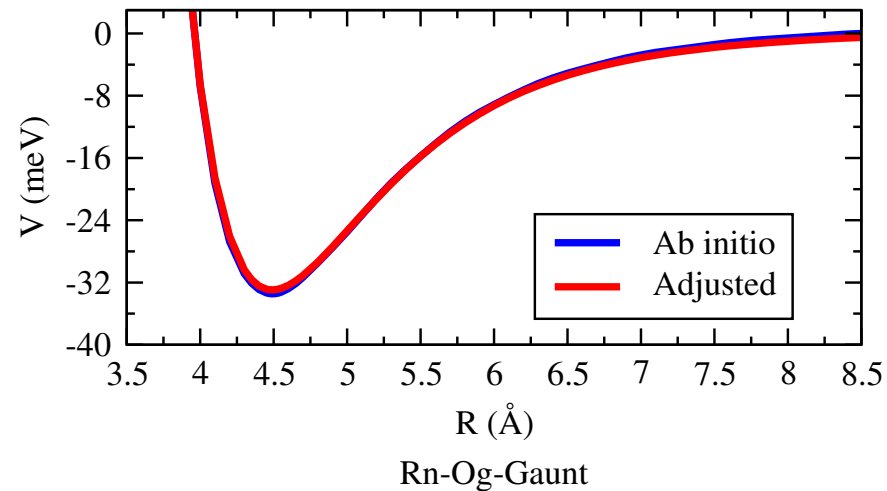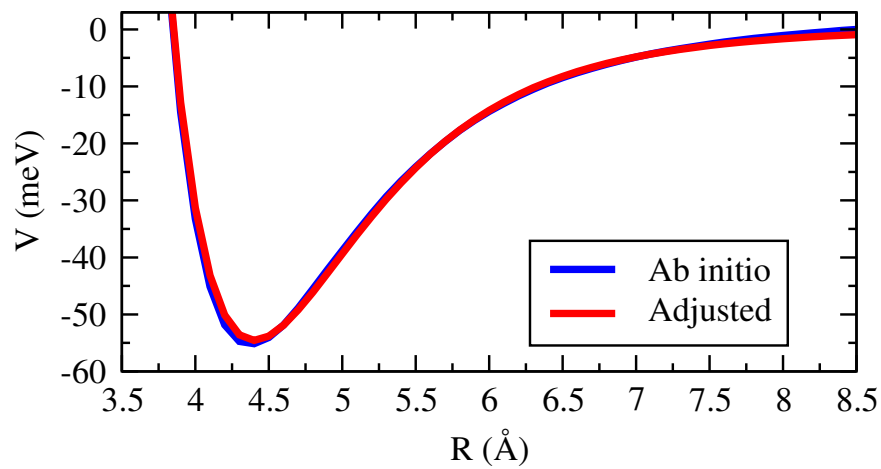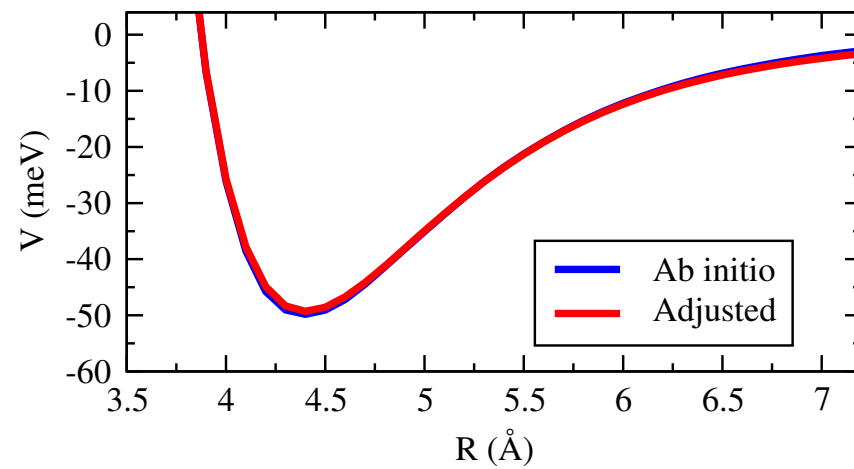

Supplement: d2cp04456k2.pdf [file d2cp04456k2.pdf]

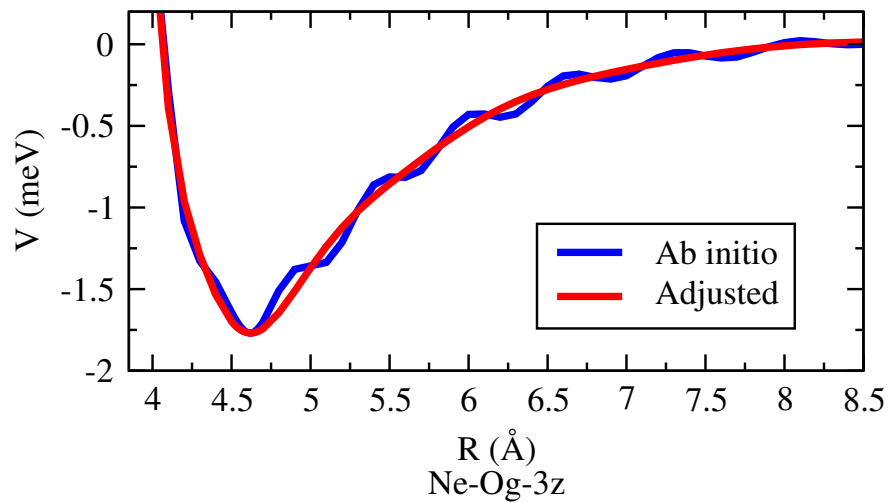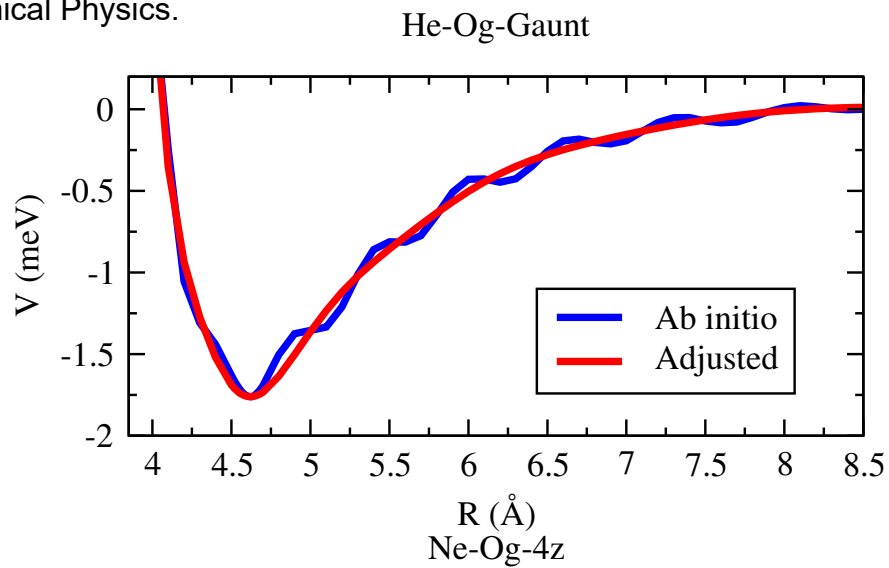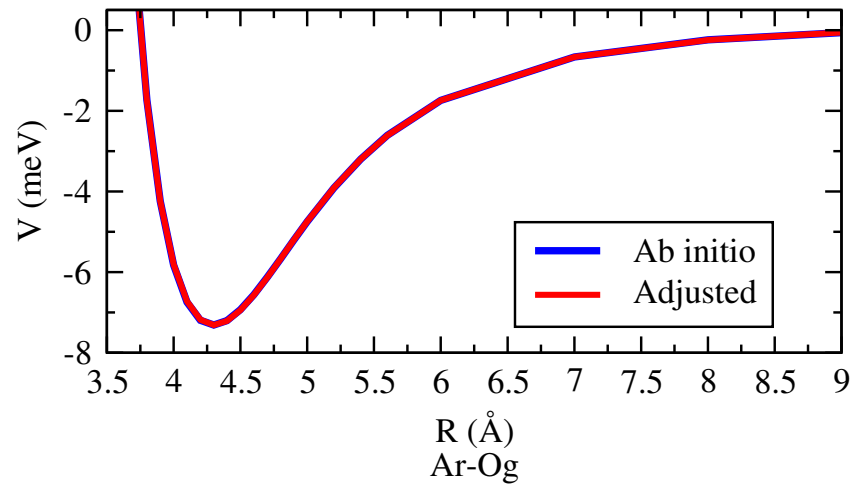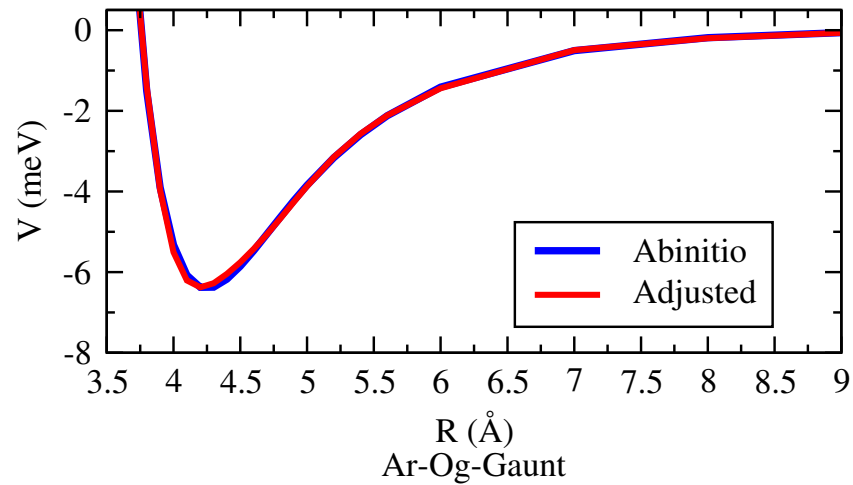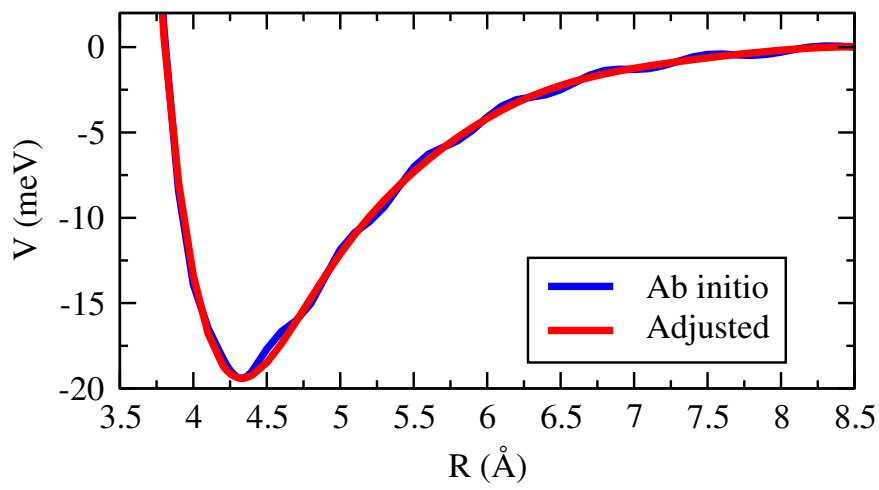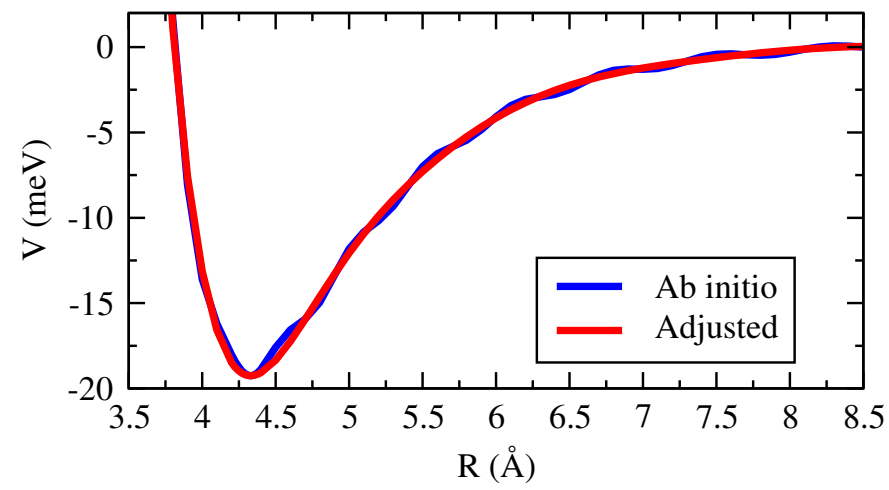

Supplement: d2cp04456k3.pdf [file d2cp04456k3.pdf]

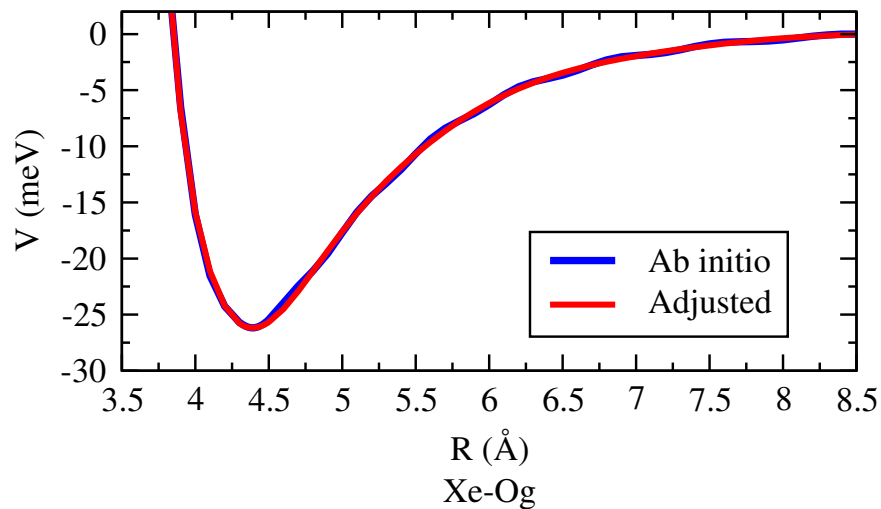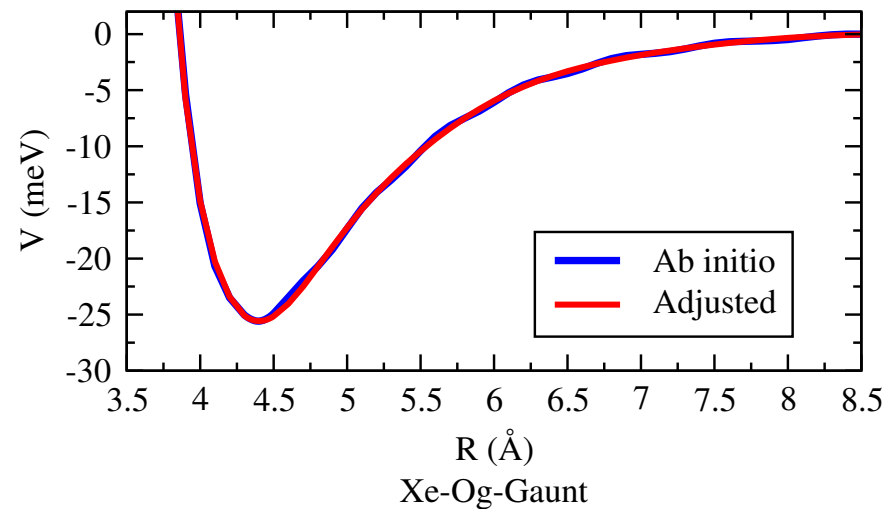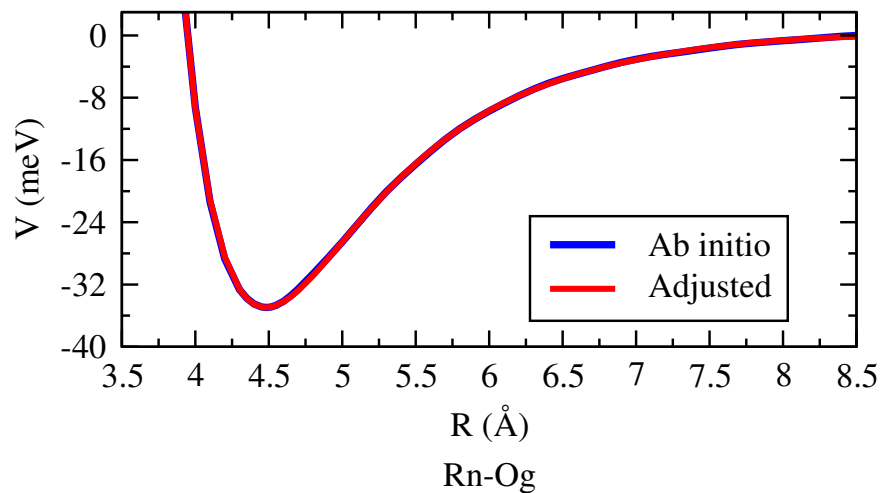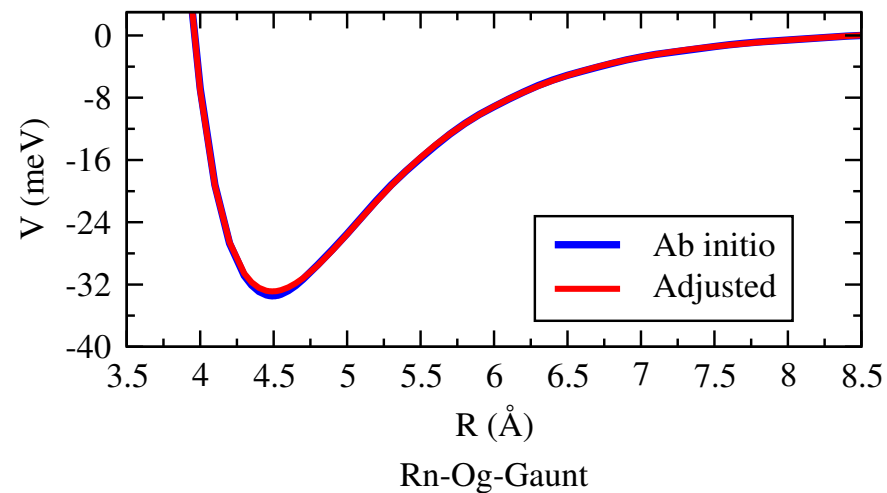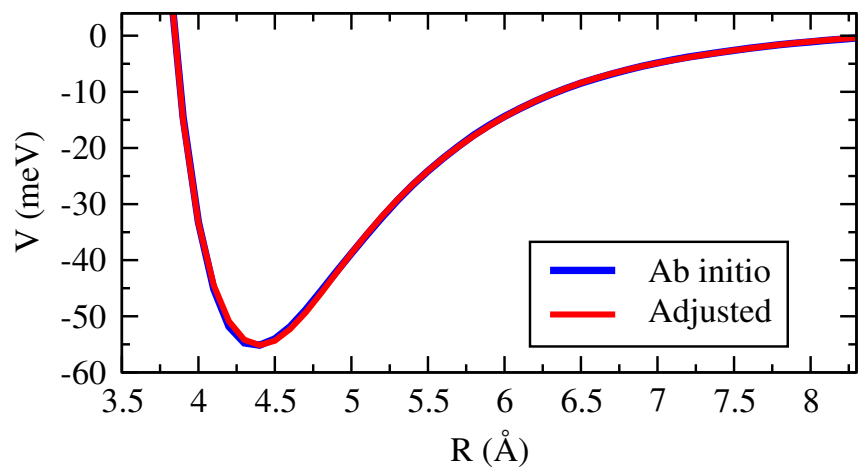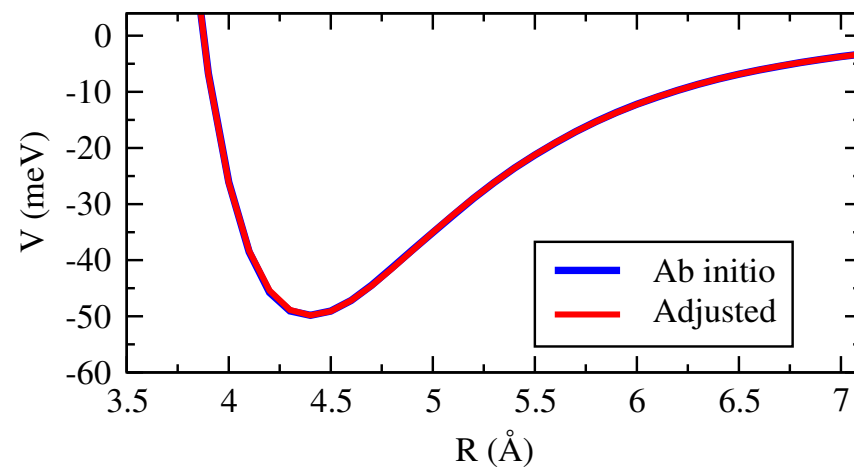

Supplement: d2cp04456k4.pdf [file d2cp04456k4.pdf]

Ne-Og

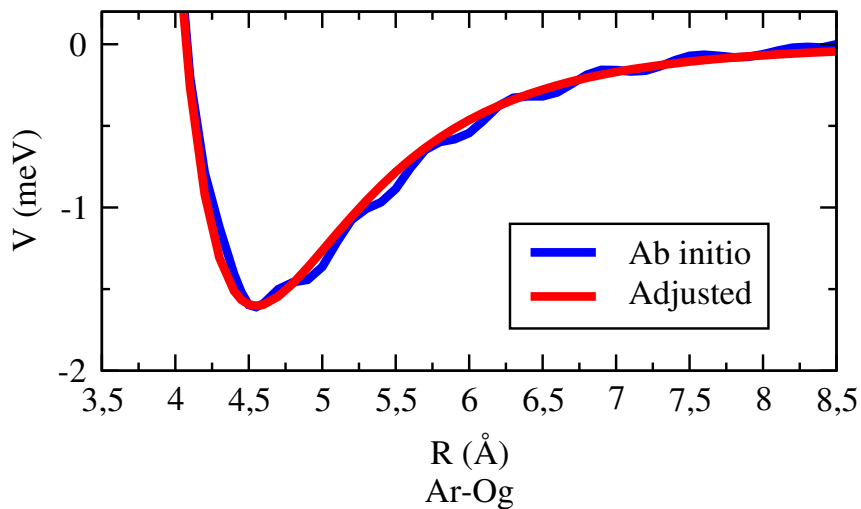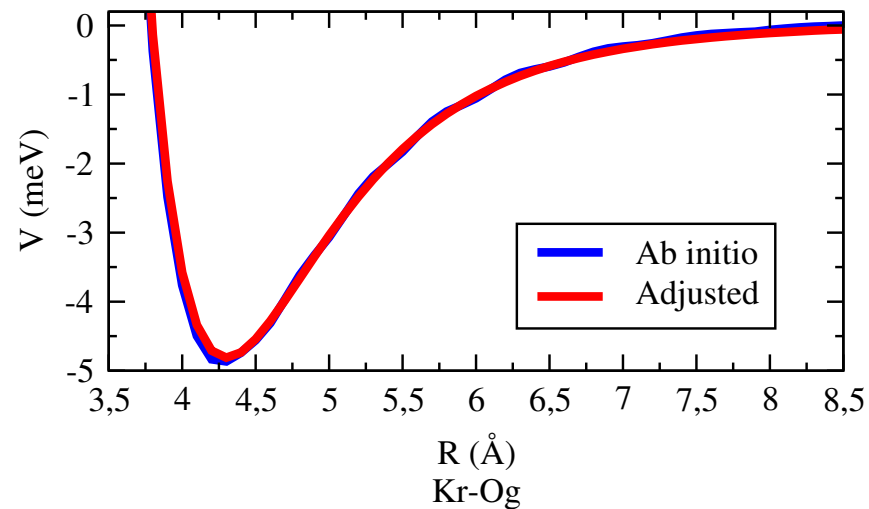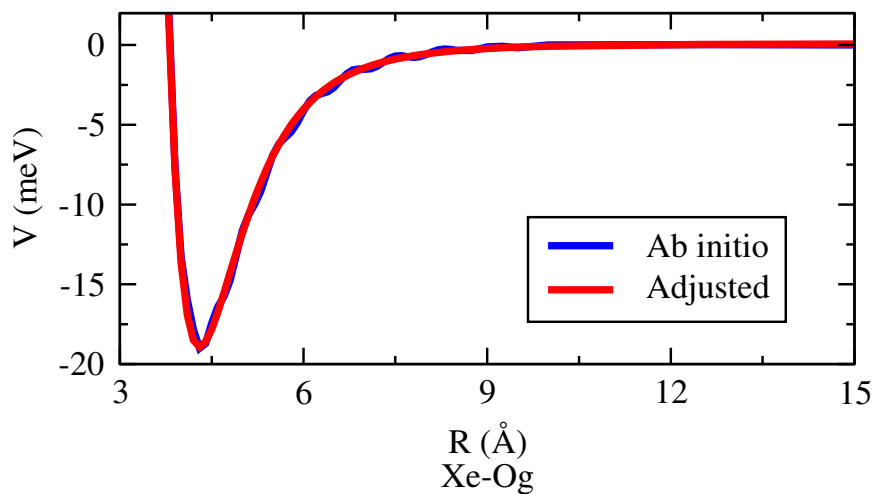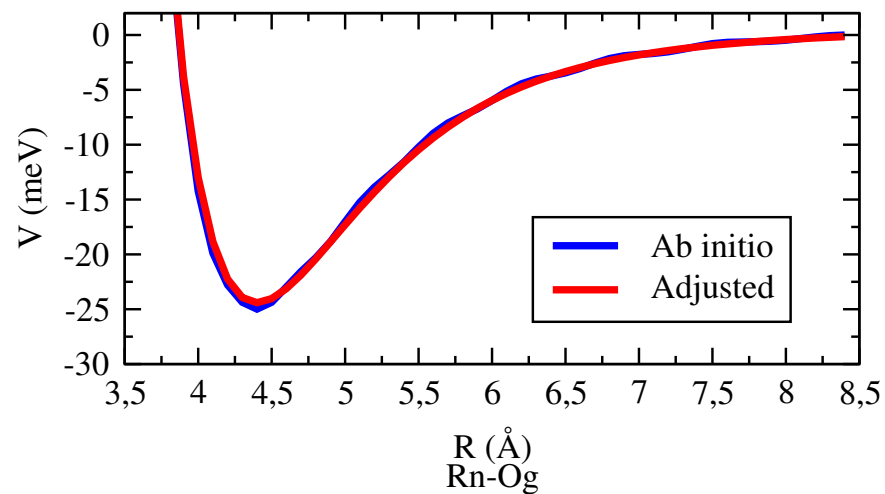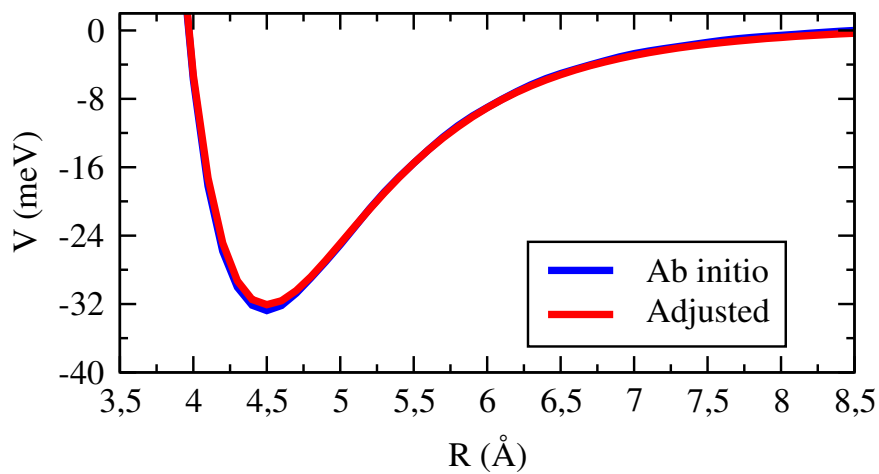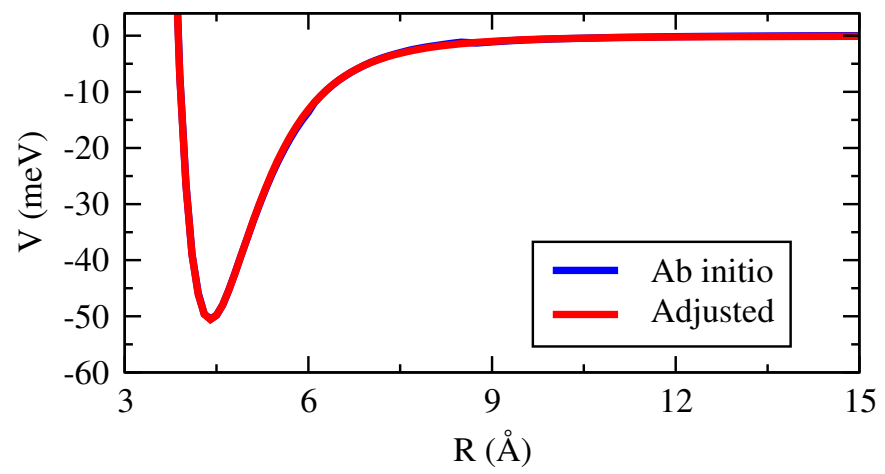

Supplement: d2cp04456k5.pdf [file d2cp04456k5.pdf]

Ne-Og

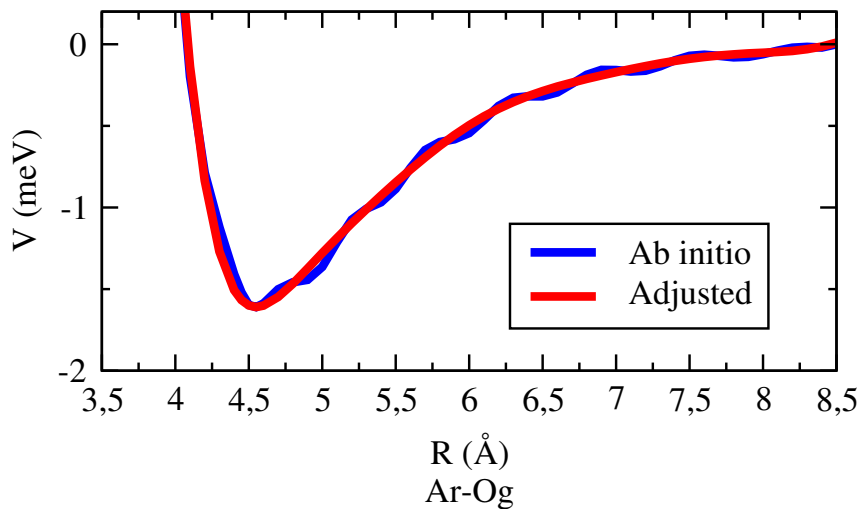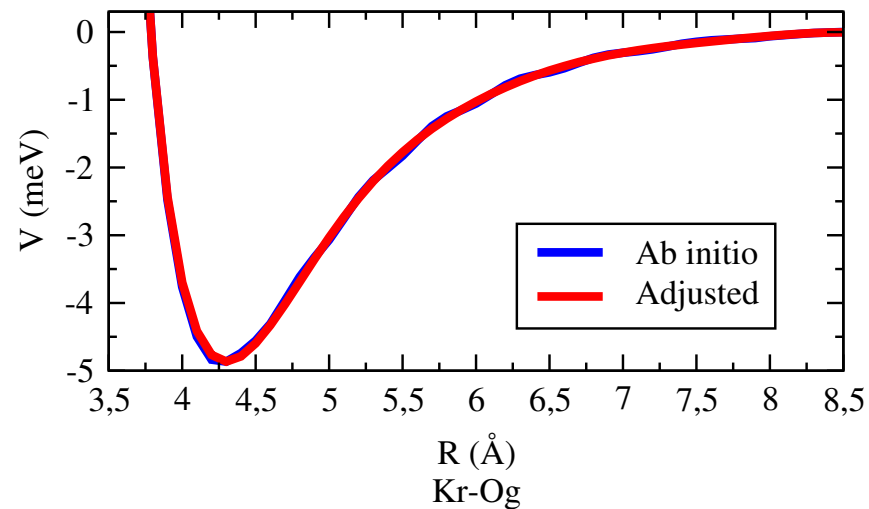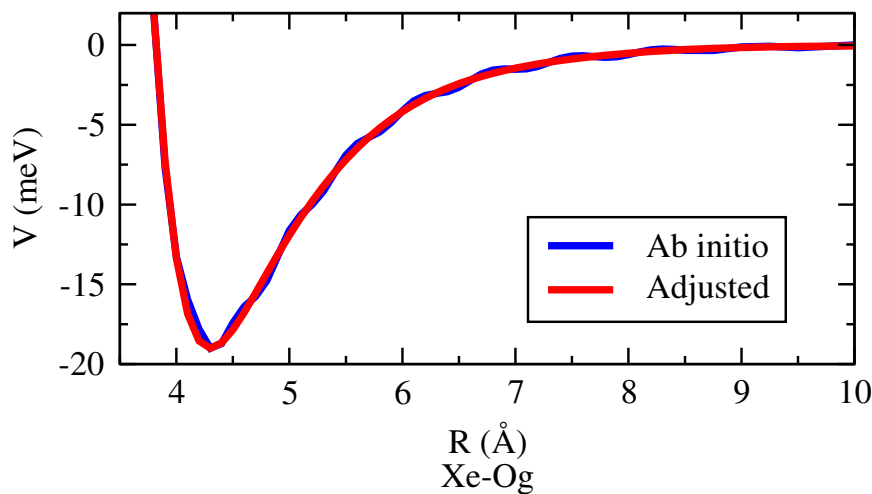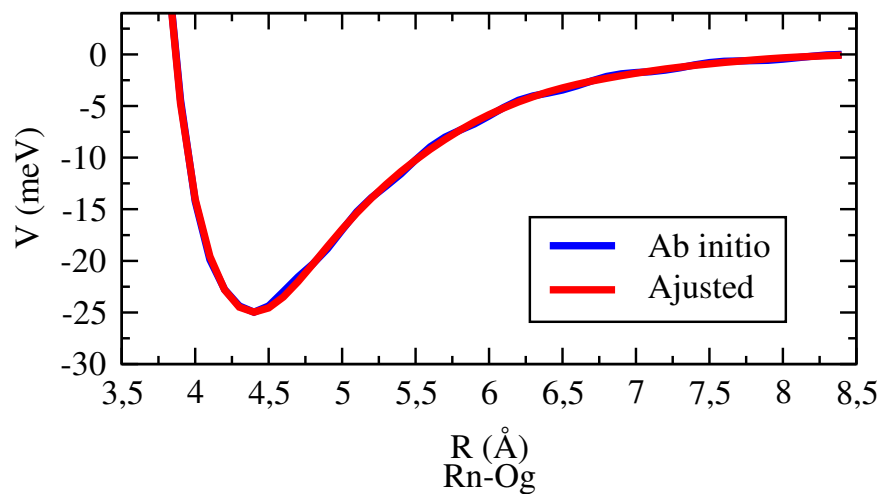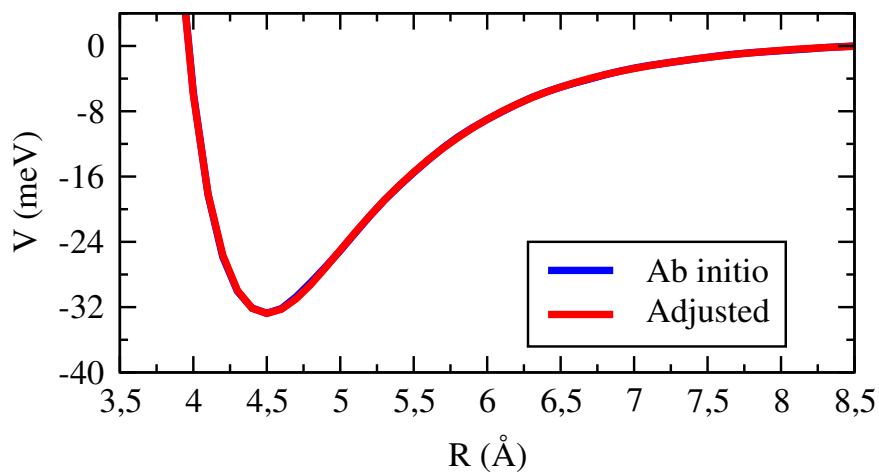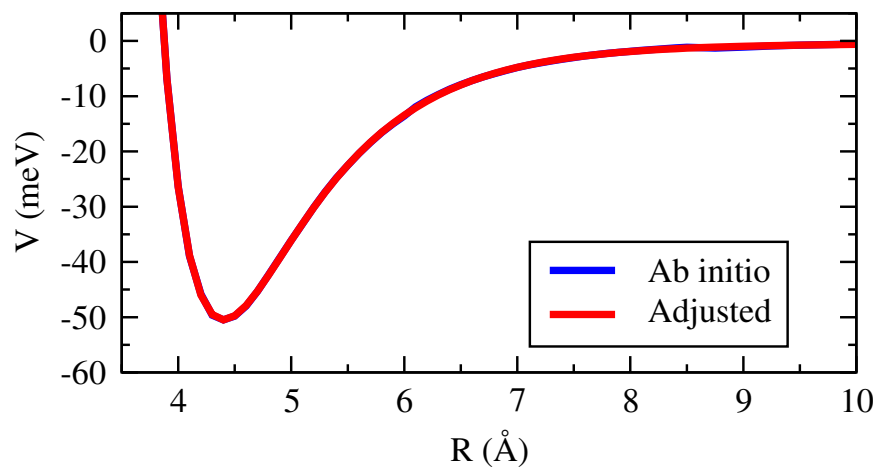

Supplement: d2cp04456k6.pdf [file d2cp04456k6.pdf]

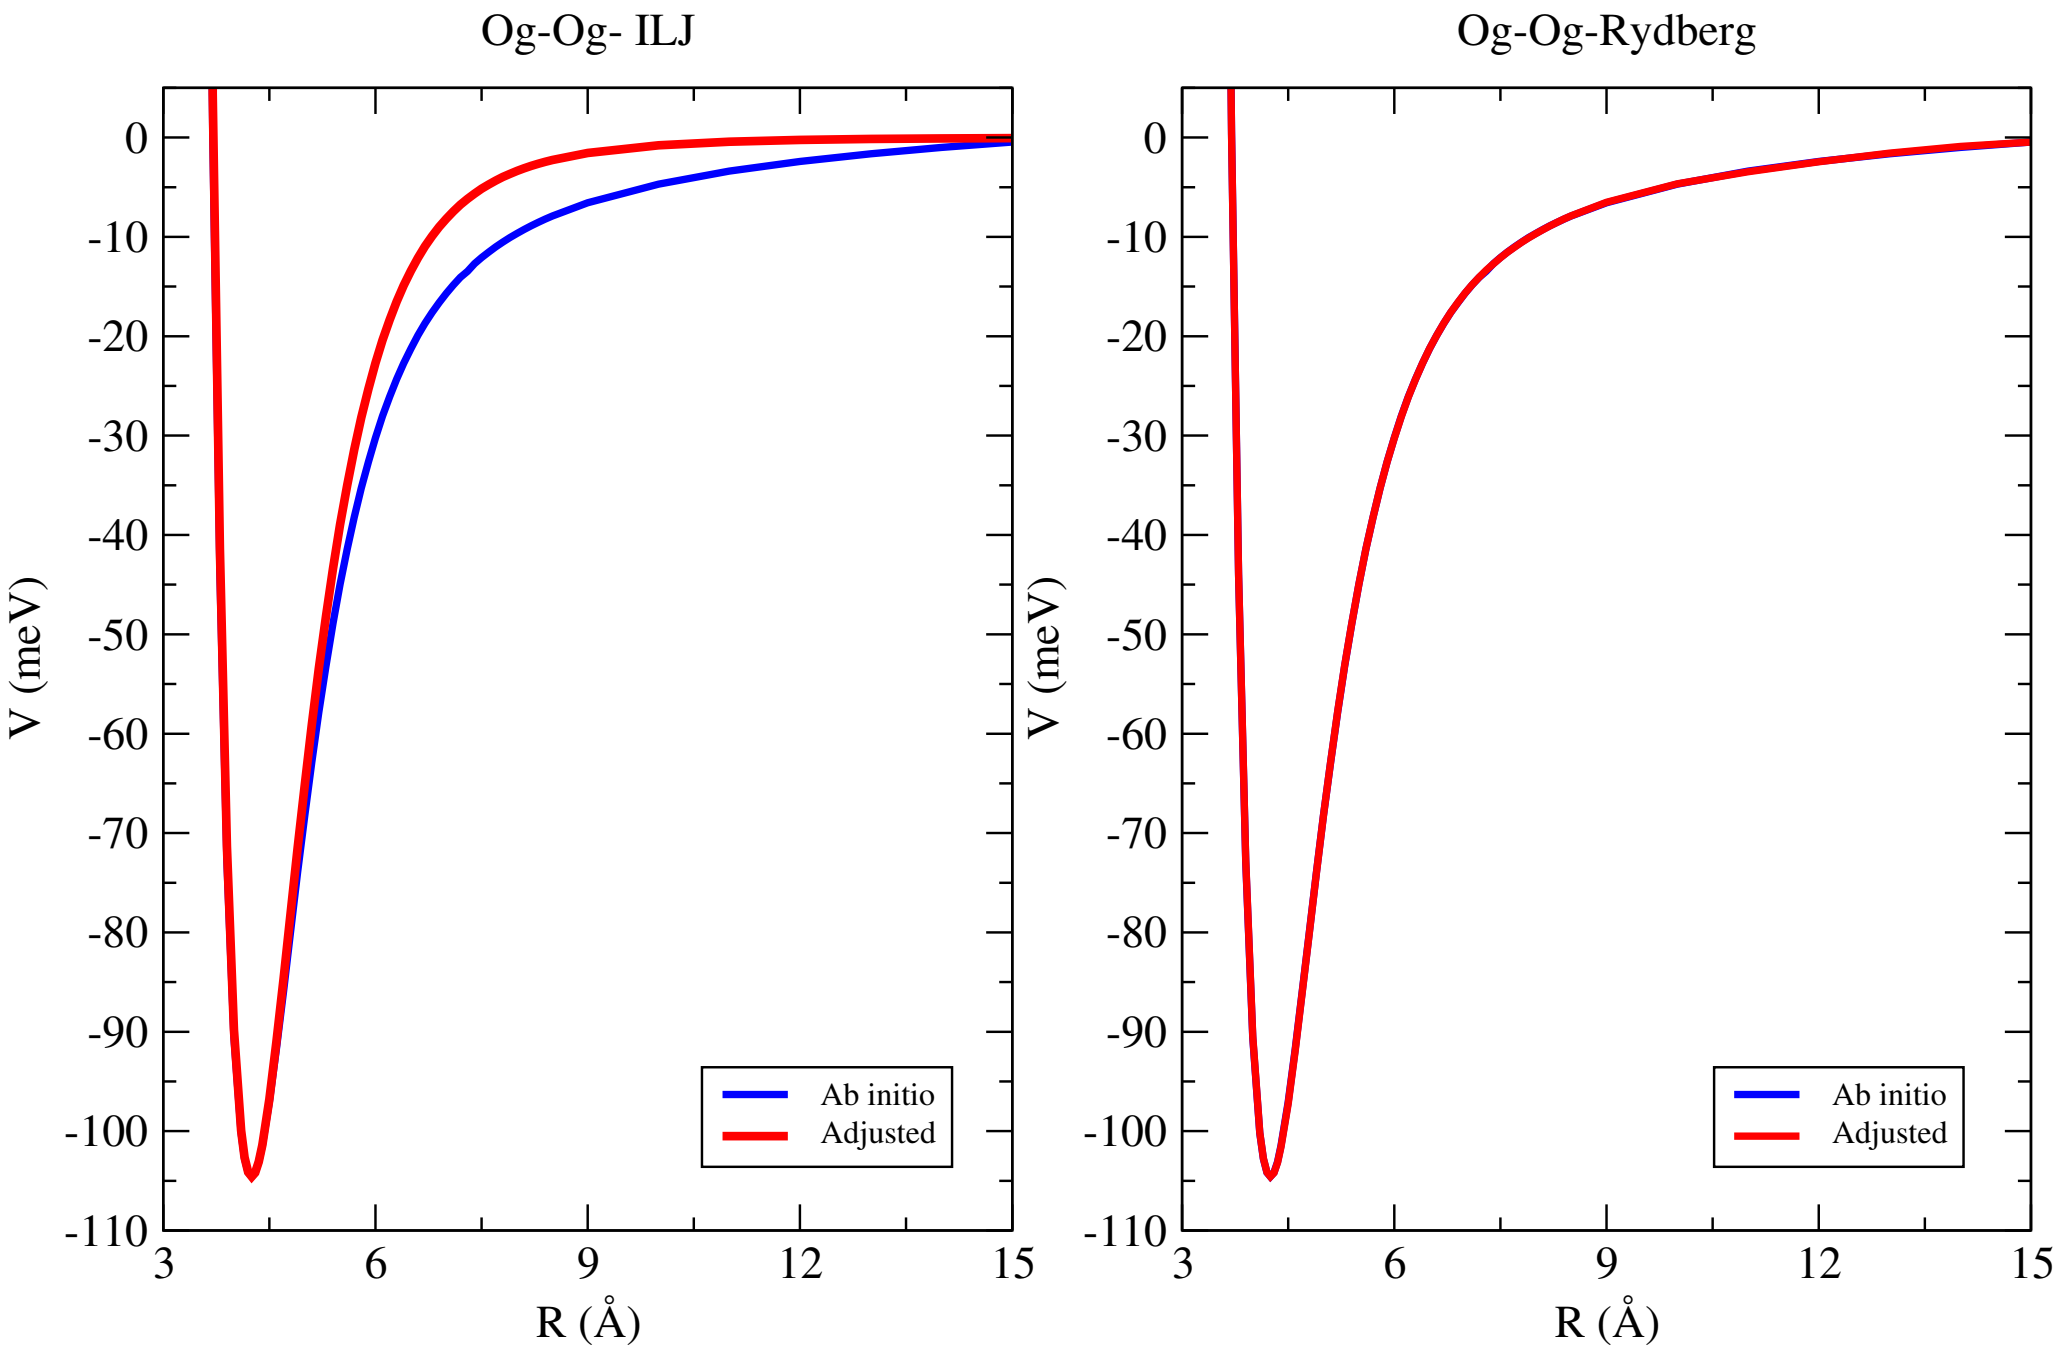

Supplement: d2cp04456k7.pdf [file d2cp04456k7.pdf]
